# Supplementary material for: In situ Entrapment of Catalase within Macroporous Cryogel Matrix for Ethanol Oxidation: Flow-through Mode versus Batch Reactor
Source: Preprints.org preprint supplement (doi:10.20944/preprints202305.2271.v1), 2023-05-31
Supplement: Supplementary file 1 [file supplementary]

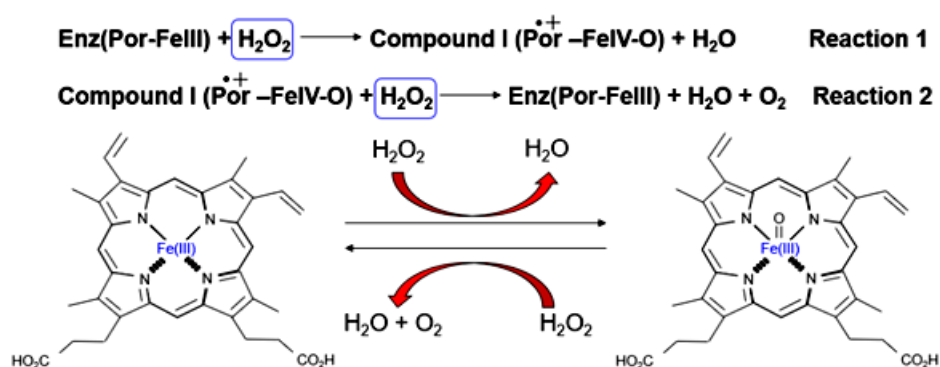

**Figure S12.** Catalase mechanism of hydrogen peroxide dismutation to water and oxygen.

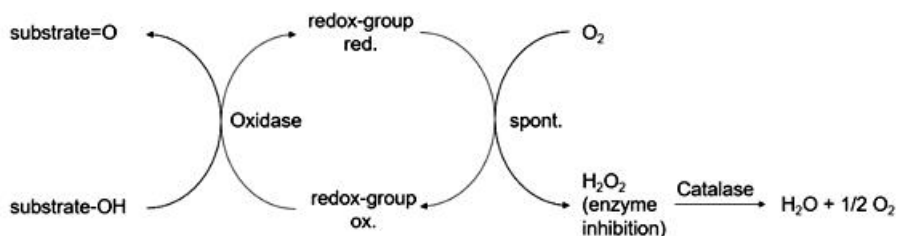

**Figure S13.** Removal of H<sub>2</sub>O<sub>2</sub> from the reaction mixture employing catalase.

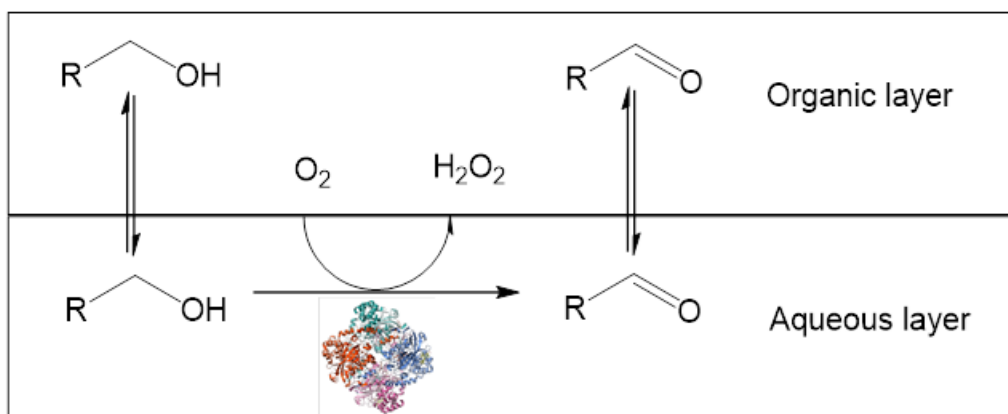

**Figure S14.** Simplified mechanism of ethanol oxidation by catalase-immobilized cryogel matrix in the presence of oxygen and air.

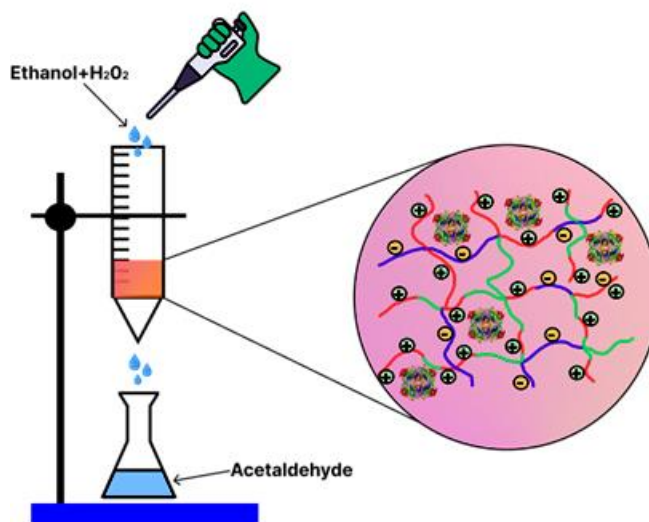

**Figure S15.** Schematic view of the cryogel-based flow-through catalytic reactor setup, with immobilized catalase for the catalytic oxidation of ethanol and hydrogen peroxide.

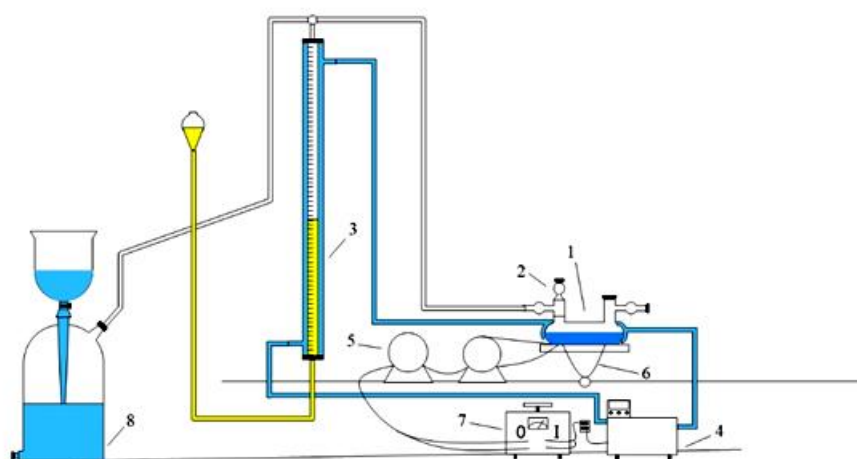

**Figure S16.** Schematic view of batch type catalytic reactor setup for the catalytic oxidation of ethanol by hydrogen peroxide, molecular oxygen and air. 1 – catalytic “duck”, 2 – valve for catalyst insertion, 3 – thermostated burette, 4 – thermostat, 5 – electric motor, 6 – shaker, 7 – laboratory autotransformer, 8 – Berzelius laboratory gasholder.
